# Supplementary material for: Duplication of 7q34 is specific to juvenile pilocytic astrocytomas and a hallmark of cerebellar and optic pathway tumours
Source: PubMed Central journal article supplement (PMC2736806; doi:10.1038/sj.bjc.6605179), 2009-07-14
Supplement: 6605179x1.pdf [file 6605179x1.pdf]

## Supplementary Table 1

### Primers used for real-time quantitative PCR:

*BRAF* exon 12:

F: 5' AGCACCTACACCTCAGCAGTTACA 3'

R: 5' ACCACTGGGAACCAGGAGCTAATA 3'

*HIPK2*:

F: 5' CTGGTGGGGTAGCATCTTCT 3'

R: 5' TTGCTGGAGGACTTGGACTT 3'

*TBXAS1*:

F: 5' TTCCTGCCTGTTGCTCACACTCT 3'

R: 5' TCCAAGACGCTGCCAATCCAGTTA 3'

*MRPS33*:

F: 5' TTCCGCTGCCGTAATTCCTCTCA 3'

R: 5' TTAATCTGCAGCCCACCACCCAAA 3'

*LINE-1*

F: 5' AAAGCCGCTCAACTACATGG 3'

R: 5' TGCTTTGAATGCGTCCCAGAG 3'

### Mutational analysis for *BRAF*

*BRAF* exon 12:

F: 5' AAGGGGATCTCTTCCTGTATCC 3'

R: 5' GAGTCCCGACTGCTGTGAAC 3'

*BRAF* exon 15:

F: 5' TTGACTCTAAGAGGAAAGATGAAGT 3'

R: 5' TTGAGACCTTCAATGACTTTCTAGT 3'
