# Supplementary material for: Duplication of 7q34 is specific to juvenile pilocytic astrocytomas and a hallmark of cerebellar and optic pathway tumours
Source: PubMed Central journal article supplement (PMC2736806; doi:10.1038/sj.bjc.6605179), 2009-07-14
Supplement: 6605179x2.pdf [file 6605179x2.pdf]

### Deletions (CNV) detected by GqCNV and PennCNV in at least 3 tumors

| Chr             | Locus (Mb) |           |        |        | Nb tumors | Genes                               | Detected in database of Genomic Variants |
|-----------------|------------|-----------|--------|--------|-----------|-------------------------------------|------------------------------------------|
|                 | Start      | End       | Size   | Nb SNP |           |                                     |                                          |
| 1p36.13         | 17086767   | 17155012  | 68246  | 11     | 6         | 3 genes LOC100129182, TRNAN2, CROCC | no                                       |
| 2p22.3          | 34544587   | 34592120  | 35482  | 32     | 5         | no gene                             | no                                       |
| 2q33.3          | 208057503  | 208071307 | 13805  | 17     | 4         | no gene                             | no                                       |
| 3q26.1          | 163746526  | 164238477 | 491952 | 105    | 5         | no gene                             | no                                       |
| 3q28            | 192547222  | 192555922 | 8701   | 18     | 5         | 1 gene CCD50                        | no                                       |
| 4q13.1          | 64350537   | 64392223  | 41687  | 18     | 4         | no gene                             | no                                       |
| 5q23.1          | 117414333  | 117421055 | 6723   | 13     | 4         | no gene                             | no                                       |
| 6p21.33-6p21.32 | 29965944   | 32763196  | 37147  | 123    | 10        | 168 genes                           | no                                       |
| 6q14.1          | 79036117   | 79086086  | 49970  | 46     | 6         | no gene                             | no                                       |
| 7q34            | 141419097  | 141439888 | 20792  | 21     | 5         | 1 MGAM                              | no                                       |
| 8p11.23-8p11.22 | 39350791   | 39509376  | 158586 | 38     | 12        | 2 genes ADAM5P, ADAM3A              | no                                       |
| 9p11.2          | 44683090   | 44797463  | 114374 | 20     | 4         | 1 gene LOC100131427                 | no                                       |
| 12p13           | 9526879    | 9607393   | 80515  | 15     | 5         | 1 OVOS                              | no                                       |
| 12p11.22        | 30125165   | 30134898  | 9734   | 10     | 4         | no gene                             | no                                       |

### Amplifications (CNV) detected by GqCVN and PennCNV in at least 3 tumors

| Chr         | Locus (Mb)       |                  |               |            | Nb tumors | Genes                                          | Detected in database of Genomic Variants |
|-------------|------------------|------------------|---------------|------------|-----------|------------------------------------------------|------------------------------------------|
|             | Start            | End              | Size          | Nb SNP     |           |                                                |                                          |
| 6q27        | 168091860        | 168319676        | 227817        | 209        | 3         | 4 genes MLLT4, LOC100128124, KIF25, FRMD1      | yes                                      |
| <b>7q34</b> | <b>139501685</b> | <b>140079362</b> | <b>577678</b> | <b>124</b> | <b>20</b> | <b>region of interest</b>                      | <b>NO</b>                                |
| 10q11.22    | 47007374         | 47167032         | 74264         | 82         | 3         | 3 genes LOC340844, LOC728684, ANTXRL           | yes                                      |
| 12p11.21    | 31157554         | 31300846         | 143293        | 55         | 9         | 3 genes LOC100132881, OVOS2, LOC441632         | no                                       |
| 19q13.42    | 59971240         | 60054671         | 83432         | 14         | 6         | 6 genes KIR2DL1-4, KIR3DP1, KIR3DL1, KIR2DS1-4 | no                                       |

**Supplementary Table 2:** Genomic alterations in the data set generated on the Hap300-Duo and 610-Qad human arrays detected by both GqCNV and PennCNV algo

rithms.
