# Supplementary material for: Duplication of 7q34 is specific to juvenile pilocytic astrocytomas and a hallmark of cerebellar and optic pathway tumours
Source: PubMed Central journal article supplement (PMC2736806; doi:10.1038/sj.bjc.6605179), 2009-07-14
Supplement: 6605179x3.pdf [file 6605179x3.pdf]

**Supplementary Table 3:** Results *BRAF* sequencing for exon 11 (BRAFE11) and exon 15 (BRAFE15)

| PCR primer pair                                       | BRAFE11                                                 | BRAFE15                                                |                  |
|-------------------------------------------------------|---------------------------------------------------------|--------------------------------------------------------|------------------|
| PCR size ( <i>bp</i> )                                | 426                                                     | 354                                                    |                  |
| SNP position in contig                                | Contig1: 319                                            | Contig2: 173                                           |                  |
| Genotype ( <i>Wildtype/Mutant</i> )                   | T/A                                                     | T/A                                                    |                  |
| Position in UCSC Genome Browser ( <i>March 2006</i> ) | Chr7: 140127723                                         | Chr7: 140099605                                        |                  |
| Position in Intron/Exon/UTR                           | Intron                                                  | Exon                                                   |                  |
| Function ( <i>Wildtype vs Mutant</i> )                | N/A                                                     | Val (GTG) vs Glu (GAG)                                 |                  |
| UCSC SNP reference number ( <i>March 2006</i> )       | New SNP                                                 | New SNP                                                |                  |
| Sample number as per Tables 1 and 2                   | 18                                                      | TT                                                     | TA               |
|                                                       | 9                                                       | TT                                                     | TT               |
|                                                       | 10                                                      | TT                                                     | TT               |
|                                                       | 11                                                      | TT                                                     | TT               |
|                                                       | 12                                                      | TT                                                     | TT               |
|                                                       | 36                                                      | TT                                                     | TT               |
|                                                       | 50                                                      | TT                                                     | TT               |
|                                                       | 14                                                      | TT                                                     | TT               |
|                                                       | 16                                                      | TT                                                     | Missing Sequence |
|                                                       | 17                                                      | TT                                                     | TT               |
|                                                       | 34                                                      | TT                                                     | TT               |
|                                                       | 35                                                      | TT                                                     | TT               |
|                                                       | 36                                                      | TT                                                     | TT               |
|                                                       | 19                                                      | TT                                                     | TT               |
|                                                       | 20                                                      | TT                                                     | TT               |
|                                                       | 53                                                      | TT                                                     | TT               |
|                                                       | 21                                                      | TT                                                     | TT               |
|                                                       | 72                                                      | TT                                                     | TT               |
|                                                       | 22                                                      | TT                                                     | TT               |
|                                                       | 63                                                      | TT                                                     | TT               |
|                                                       | 67                                                      | TT                                                     | TT               |
|                                                       | 68                                                      | TT                                                     | TT               |
|                                                       | 69                                                      | TT                                                     | TA               |
|                                                       | 23                                                      | TT                                                     | TT               |
|                                                       | 47                                                      | TT                                                     | TT               |
|                                                       | 24                                                      | TT                                                     | TT               |
| 30                                                    | TT                                                      | TT                                                     |                  |
| 25                                                    | TT                                                      | TT                                                     |                  |
| 55                                                    | TT                                                      | TT                                                     |                  |
| 26                                                    | TT                                                      | TT                                                     |                  |
| 27                                                    | TT                                                      | TT                                                     |                  |
| 54                                                    | TT                                                      | TT                                                     |                  |
| 28                                                    | TT                                                      | TT                                                     |                  |
| 29                                                    | TA                                                      | TT                                                     |                  |
| 75                                                    | TT                                                      | TT                                                     |                  |
| 37                                                    | TT                                                      | TT                                                     |                  |
| 70                                                    | TT                                                      | TT                                                     |                  |
| 73                                                    | TT                                                      | TT                                                     |                  |
| 71                                                    | TT                                                      | TT                                                     |                  |
| 74                                                    | TT                                                      | TT                                                     |                  |
| <b>Surrounding Sequence</b>                           | gttcgcatcaataaactatTTgatT agttt<br>caggactcctccaaaagttt | ataggTgattttggtctagctacagTgaa<br>atctcgatggagtggtgccca |                  |
